# Supplementary material for: Association between Sedentary Behavior and Cognitive Performance in Middle-Aged and Elderly Adults: Cross-Sectional Results from ELSA-Brasil
Source: MDPI journal article supplement (doi:10.3390/ijerph192114234), 2022-10-31
Supplement: s1 [file s1]

**Table S1.** Score on cognitive function tests according to sociodemographic characteristics and physical activity of the sample stratified by sex. ELSA-Brasil (2012-2014)

|                                     | Total                 |               | Men                   |               | Women                 |               |
|-------------------------------------|-----------------------|---------------|-----------------------|---------------|-----------------------|---------------|
|                                     | Cognitive performance |               | Cognitive performance |               | Cognitive performance |               |
|                                     | Mean (SD)             | IC 95%        | Mean (SD)             | IC 95%        | Mean (SD)             | IC 95%        |
| <b>Memory*</b>                      |                       |               |                       |               |                       |               |
| Schooling                           | <b>n=6505</b>         |               | <b>n=2915</b>         |               | <b>n=3590</b>         |               |
| <i>Incomplete elementary school</i> | 32.50 (6.35)          | 31.84 - 33.17 | 31.44 (6.23)          | 30.60 - 32.28 | 34.14 (6.21)          | 33.10 - 35.18 |
| <i>Complete elementary school</i>   | 33.60 (6.10)          | 33.08 - 34.13 | 32.65 (6.00)          | 31.92 - 33.37 | 34.60 (6.05)          | 33.85 - 35.35 |
| <i>High school</i>                  | 36.15 (5.84)          | 35.88 - 36.42 | 34.51 (5.82)          | 34.09 - 34.92 | 37.29 (5.58)          | 36.96 - 37.63 |
| <i>Higher education</i>             | 39.07 (5.61)          | 38.89 - 39.25 | 37.61 (5.73)          | 37.34 - 37.89 | 40.23 (5.24)          | 40.01 - 40.45 |
| Race/skin colour, n (%)             | <b>n=6415</b>         |               | <b>n=2866</b>         |               | <b>n=3549</b>         |               |
| <i>Black</i>                        | 35.85 (5.90)          | 35.47 - 36.23 | 34.04 (5.91)          | 33.41 - 34.66 | 36.93 (5.63)          | 36.47 - 37.39 |
| <i>Brown</i>                        | 36.65 (6.23)          | 36.35 - 36.95 | 34.84 (6.37)          | 34.38 - 35.31 | 38.14 (5.69)          | 37.77 - 38.51 |
| <i>White</i>                        | 38.29 (6.02)          | 38.09 - 38.49 | 36.85 (5.99)          | 36.57 - 37.14 | 39.56 (5.75)          | 39.30 - 39.82 |
| <i>Yellow</i>                       | 37.16 (5.93)          | 36.32 - 38.01 | 33.91 (5.95)          | 32.48 - 35.34 | 38.99 (5.10)          | 38.07 - 39.90 |
| <i>Indigenous</i>                   | 34.02 (6.83)          | 32.39 - 35.65 | 32.09 (6.42)          | 29.74 - 34.45 | 35.56 (6.85)          | 33.34 - 37.78 |
| Socioeconomic position, n (%)       | <b>n=6381</b>         |               | <b>n=2868</b>         |               | <b>n=3513</b>         |               |
| <i>High</i>                         | 39.01 (5.67)          | 38.79 - 39.23 | 37.57 (5.74)          | 37.26 - 37.87 | 40.52 (5.20)          | 40.23 - 40.81 |
| <i>Medium</i>                       | 37.36 (6.02)          | 37.11 - 37.61 | 35.58 (6.07)          | 35.15 - 36.00 | 38.33 (5.76)          | 38.03 - 38.62 |
| <i>Low</i>                          | 34.76 (6.22)          | 34.45 - 35.08 | 33.08 (6.08)          | 32.64 - 33.52 | 36.39 (5.91)          | 35.97 - 36.81 |

| Marital status, n (%)               | n=6505       |               | n=2915       |               | n=3590       |               |
|-------------------------------------|--------------|---------------|--------------|---------------|--------------|---------------|
| <i>Married/stable union</i>         | 37.20 (6.23) | 37.01 - 37.40 | 35.92 (6.21) | 35.67 - 36.17 | 39.15 (5.76) | 38.86 - 39.44 |
| <i>Divorced</i>                     | 37.91 (5.98) | 37.57 - 38.26 | 35.76 (5.97) | 35.10 - 36.41 | 38.74 (5.78) | 38.35 - 39.13 |
| <i>Widower</i>                      | 36.53 (6.15) | 36.00 - 37.07 | 33.78 (6.33) | 32.23 - 35.34 | 36.94 (6.03) | 36.38 - 37.50 |
| <i>Single</i>                       | 38.42 (5.71) | 38.04 - 38.81 | 36.57 (6.20) | 35.54 - 37.59 | 38.79 (5.54) | 38.38 - 39.20 |
| <i>Other</i>                        | 39.07 (6.20) | 37.11 - 41.03 | 39.06 (6.73) | 35.47 - 42.65 | 39.08 (5.98) | 36.60 - 41.55 |
| Physical Activity                   |              |               |              |               |              |               |
| <i>Inactive</i>                     | 37.00 (6.21) | 36.78 - 37.21 | 35.51 (6.28) | 35.18 - 35.84 | 38.09 (5.92) | 37.82 - 38.36 |
| <i>Active</i>                       | 37.90 (6.04) | 37.69 - 38.10 | 36.25 (6.10) | 35.94 - 36.55 | 39.37 (5.58) | 39.11 - 39.64 |
| <b>Language**</b>                   |              |               |              |               |              |               |
| Schooling                           | n=6505       |               | n=2915       |               | n=3590       |               |
| <i>Incomplete elementary school</i> | 19.43 (6.05) | 18.80 - 20.07 | 18.83 (6.12) | 18.00 - 19.65 | 20.37 (5.84) | 19.39 - 21.34 |
| <i>Complete elementary school</i>   | 21.83 (6.30) | 21.28 - 22.37 | 21.15 (6.32) | 20.38 - 21.91 | 22.53 (6.22) | 21.77 - 23.30 |
| <i>High school</i>                  | 25.45 (7.09) | 25.13 - 25.78 | 23.96 (6.94) | 23.47 - 24.46 | 26.50 (7.02) | 26.08 - 26.91 |
| <i>Higher education</i>             | 31.36 (7.61) | 31.11 - 31.60 | 30.29 (7.51) | 29.93 - 30.65 | 32.20 (7.58) | 31.88 - 32.53 |
| Race/skin colour, n (%)             | n=6415       |               | n=2866       |               | n=3549       |               |
| <i>Black</i>                        | 25.35 (7.78) | 24.85 - 25.85 | 23.63 (7.26) | 22.86 - 24.40 | 26.37 (7.90) | 25.73 - 27.02 |
| <i>Brown</i>                        | 26.36 (8.03) | 25.96 - 26.75 | 24.54 (7.82) | 23.97 - 25.10 | 27.85 (7.90) | 27.33 - 28.37 |
| <i>White</i>                        | 29.94 (8.07) | 29.67 - 30.20 | 28.76 (8.04) | 28.37 - 29.14 | 30.98 (7.95) | 30.62 - 31.33 |
| <i>Yellow</i>                       | 28.58 (8.27) | 27.40 - 29.76 | 25.50 (8.71) | 23.41 - 27.60 | 30.30 (7.52) | 28.96 - 31.65 |
| <i>Indigenous</i>                   | 23 (7.58)    | 21.19 - 24.80 | 22.19 (7.90) | 19.29 - 25.09 | 23.64 (7.36) | 21.25 - 26.02 |

|                                     |                 |                 |                 |                 |                 |                 |
|-------------------------------------|-----------------|-----------------|-----------------|-----------------|-----------------|-----------------|
| Socioeconomic position, n (%)       | <b>n=6381</b>   |                 | <b>n=2868</b>   |                 | <b>n=3513</b>   |                 |
| <i>High</i>                         | 31.68 (7.63)    | 31.39 - 31.97   | 30.51 (7.48)    | 30.11 - 30.91   | 32.9 (7.60)     | 32.48 - 33.31   |
| <i>Medium</i>                       | 27.44 (7.82)    | 27.12 - 27.77   | 25.79 (7.85)    | 25.24 - 26.34   | 28.34 (7.66)    | 27.95 - 28.73   |
| <i>Low</i>                          | 23.49 (7.35)    | 23.12 - 23.86   | 21.79 (6.83)    | 21.30 - 22.28   | 25.13 (7.46)    | 24.61 - 25.66   |
| Marital status, n (%)               | <b>n=6505</b>   |                 | <b>n=2915</b>   |                 | <b>n=3590</b>   |                 |
| <i>Married/stable union</i>         | 28.00 (8.32)    | 27.74 - 28.26   | 26.95 (8.23)    | 26.62 - 27.28   | 29.60 (8.20)    | 29.19 - 30.01   |
| <i>Divorced</i>                     | 28.87 (8.15)    | 28.40 - 29.35   | 26.88 (8.04)    | 26.00 - 27.77   | 29.64 (8.07)    | 29.09 - 30.18   |
| <i>Widower</i>                      | 27.41 (8.39)    | 26.69 - 28.14   | 24.22 (8.22)    | 22.20 - 26.25   | 27.88 (8.32)    | 27.11 - 28.65   |
| <i>Single</i>                       | 29.01 (8.01)    | 28.47 - 29.55   | 28.45 (8.84)    | 26.98 - 29.91   | 29.12 (7.84)    | 28.55 - 29.70   |
| <i>Other</i>                        | 32.53 (8.42)    | 29.87 - 35.19   | 30.31 (6.43)    | 26.88 - 33.74   | 33.96 (9.32)    | 30.11 - 37.80   |
| Physical Activity                   |                 |                 |                 |                 |                 |                 |
| <i>Inactive</i>                     | 27.32 (8.18)    | 27.03 - 27.60   | 26.13 (8.20)    | 25.70 - 26.57   | 28.19 (8.06)    | 27.82 - 28.55   |
| <i>Active</i>                       | 29.22 (8.26)    | 28.94 - 29.50   | 27.72 (8.22)    | 27.31 - 28.13   | 30.57 (8.06)    | 30.19 - 30.95   |
| <b>Executive function***</b>        |                 |                 |                 |                 |                 |                 |
| Schooling                           | <b>n=6505</b>   |                 | <b>n=2915</b>   |                 | <b>n=3590</b>   |                 |
| <i>Incomplete elementary school</i> | 271.18 (192.08) | 251.13 - 291.23 | 275.89 (203.55) | 248.52 - 303.25 | 263.95 (173.47) | 234.96 - 292.94 |
| <i>Complete elementary school</i>   | 205.88 (112.61) | 196.15 - 215.61 | 208.96 (115.95) | 194.88 - 223.04 | 202.69 (109.18) | 189.20 - 216.18 |
| <i>High school</i>                  | 163.80 (91.61)  | 159.62 - 167.99 | 169.16 (90.92)  | 162.68 - 175.64 | 160.06 (91.94)  | 154.59 - 165.53 |
| <i>Higher education</i>             | 102.01 (50.45)  | 100.40 - 103.61 | 102.40 (55.95)  | 99.72 - 105.07  | 101.70 (45.62)  | 99.75 - 103.64  |
| Race/skin colour, n (%)             | <b>n=6415</b>   |                 | <b>n=2866</b>   |                 | <b>n=3549</b>   |                 |
| <i>Black</i>                        | 181.27 (120.67) | 173.47 - 189.06 | 193.70 (135.69) | 179.31 - 208.09 | 173.88 (110.25) | 164.88 - 182.88 |
| <i>Brown</i>                        | 158.18 (102.79) | 153.19 - 163.17 | 165.55 (105.13) | 157.95 - 173.15 | 152.12 (100.48) | 145.53 - 158.71 |

|                               |                             |                 |                 |                 |                 |                 |                 |
|-------------------------------|-----------------------------|-----------------|-----------------|-----------------|-----------------|-----------------|-----------------|
|                               | <i>White</i>                | 115.38 (72.16)  | 113.02 - 117.74 | 119.97 (81.99)  | 116.05 - 123.89 | 111.33 (61.96)  | 108.55 - 114.11 |
|                               | <i>Yellow</i>               | 123.34 (81.01)  | 111.81 - 134.87 | 133.14 (84.39)  | 112.87 - 153.41 | 117.84 (78.87)  | 103.76 - 131.92 |
|                               | <i>Indigenous</i>           | 215.2 (175.88)  | 173.26 - 257.13 | 271.51 (226.71) | 188.35 - 354.67 | 170.43 (104.64) | 136.51 - 204.35 |
| Socioeconomic position, n (%) |                             | <b>n=6381</b>   |                 | <b>n=2868</b>   |                 | <b>n=3513</b>   |                 |
|                               | <i>High</i>                 | 100.37 (51.88)  | 98.38 - 102.36  | 100.14 (52.71)  | 97.31 - 102.97  | 100.60 (51.02)  | 97.80 - 103.40  |
|                               | <i>Medium</i>               | 144.48 (87.45)  | 140.87 - 148.09 | 150.92 (90.73)  | 144.60 - 157.25 | 140.99 (85.45)  | 136.61 - 145.37 |
|                               | <i>Low</i>                  | 191.81 (132.29) | 185.13 - 198.49 | 210.53 (145.17) | 200.06 - 220.99 | 173.78 (115.84) | 165.58 - 181.98 |
| Marital status, n (%)         |                             | <b>n=6505</b>   |                 | <b>n=2915</b>   |                 | <b>n=3590</b>   |                 |
|                               | <i>Married/stable union</i> | 136.14 (97.76)  | 133.08 - 139.19 | 142.42 (107.73) | 138.08 - 146.76 | 126.61 (79.41)  | 122.68 - 130.55 |
|                               | <i>Divorced</i>             | 130.22 (87.90)  | 125.15 - 135.29 | 138.30 (88.69)  | 128.55 - 148.06 | 127.13 (87.46)  | 121.20 - 133.06 |
|                               | <i>Widower</i>              | 161.02 (102.25) | 152.17 - 169.88 | 162.98 (95.73)  | 139.45 - 186.51 | 160.74 (103.27) | 151.16 - 170.32 |
|                               | <i>Single</i>               | 137.21 (90.95)  | 131.11 - 143.30 | 142.60 (100.62) | 125.91 - 159.29 | 136.13 (88.94)  | 129.60 - 142.66 |
|                               | <i>Other</i>                | 109.92 (64.23)  | 89.65 - 130.20  | 96.56 (39.68)   | 75.41 - 117.70  | 118.48 (75.48)  | 87.32 - 149.63  |
| Physical Activity             |                             | <b>n=6505</b>   |                 | <b>n=2915</b>   |                 | <b>n=3590</b>   |                 |
|                               | <i>Inactive</i>             | 145.41 (103.61) | 141.84 - 148.98 | 150.22 (114.00) | 144.18 - 156.26 | 141.89 (95.14)  | 137.57 - 146.20 |
|                               | <i>Active</i>               | 128.72 (86.31)  | 125.76 - 131.68 | 135.06 (95.79)  | 130.28 - 139.84 | 123.03 (76.40)  | 119.42 - 126.64 |

SD: standard deviation; 95% CI: 95% Confidence Interval. \* Learning, recall and word recognition: number of correct words: score ranges from 0 to 50. \*\* Semantic and phonemic verbal fluency: number of words remembered in 1 minute. \*\*\* Trail test (part B): time (in seconds) to perform the test.

**Table S2.** Sitting time (in hours/day) during the week and weekend according to sociodemographic characteristics and physical activity in the sample stratified by sex. ELSA-Brasil (2012-2014)

| Sedentary behaviour                        | Total         |             | Men           |             | Women         |             |
|--------------------------------------------|---------------|-------------|---------------|-------------|---------------|-------------|
|                                            | Mean (SD)     | IC 95%      | Mean (SD)     | IC 95%      | Mean (SD)     | IC 95%      |
| <b>Sitting time (hours/day) - Weekdays</b> |               |             |               |             |               |             |
| Schooling                                  | <b>n=6505</b> |             | <b>n=2915</b> |             | <b>n=3590</b> |             |
| <i>Incomplete elementary school</i>        | 3.40 (2.88)   | 3.10 - 3.70 | 3.72 (2.91)   | 3.32 - 4.11 | 2.92 (2.78)   | 2.45 - 3.38 |
| <i>Complete elementary school</i>          | 3.88 (2.89)   | 3.63 - 4.13 | 4.15 (2.87)   | 3.80 - 4.49 | 3.60 (2.88)   | 3.25 - 3.96 |
| <i>High school</i>                         | 4.40 (3.01)   | 4.26 - 4.54 | 4.72 (3.12)   | 4.49 - 4.94 | 4.18 (2.91)   | 4.02 - 4.36 |
| <i>Higher education</i>                    | 6.53 (3.14)   | 6.43 - 6.63 | 6.89 (3.07)   | 6.74 - 7.04 | 6.23 (3.17)   | 6.10 - 6.37 |
| Race/skin colour, n (%)                    | <b>n=6415</b> |             | <b>n=2866</b> |             | <b>n=3549</b> |             |
| <i>Black</i>                               | 4.32 (2.93)   | 4.13 - 4.51 | 4.71 (3.00)   | 4.40 - 5.03 | 4.08 (2.86)   | 3.85 - 4.31 |
| <i>Brown</i>                               | 4.91 (3.35)   | 4.75 - 5.08 | 5.01 (3.22)   | 4.78 - 5.25 | 4.83 (3.45)   | 4.60 - 5.06 |
| <i>White</i>                               | 6.12 (3.19)   | 6.01 - 6.22 | 6.41 (3.22)   | 6.25 - 6.56 | 5.86 (3.14)   | 5.72 - 6.00 |
| <i>Yellow</i>                              | 6.17 (3.53)   | 5.67 - 6.67 | 6.60 (3.64)   | 5.72 - 7.47 | 5.93 (3.45)   | 5.31 - 6.55 |
| <i>Indigenous</i>                          | 3.89 (2.48)   | 3.30 - 4.48 | 3.86 (2.97)   | 2.76 - 4.95 | 3.92 (2.05)   | 3.25 - 4.59 |
| Socioeconomic position, n (%)              | <b>n=6381</b> |             | <b>n=2868</b> |             | <b>n=3513</b> |             |
| <i>High</i>                                | 6.67 (3.16)   | 6.54 - 6.79 | 7.00 (3.07)   | 6.83 - 7.16 | 6.32 (3.22)   | 6.14 - 6.50 |
| <i>Medium</i>                              | 5.17 (3.23)   | 5.04 - 5.31 | 5.48 (3.23)   | 5.26 - 5.71 | 5.01 (3.21)   | 4.84 - 5.17 |
| <i>Low</i>                                 | 4.12 (2.91)   | 3.97 - 4.27 | 4.11 (2.86)   | 3.91 - 4.32 | 4.12 (2.95)   | 3.91 - 4.33 |

|                                            |               |             |               |             |               |             |
|--------------------------------------------|---------------|-------------|---------------|-------------|---------------|-------------|
| Marital status, n (%)                      | <b>n=6505</b> |             | <b>n=2915</b> |             | <b>n=3590</b> |             |
| <i>Married/stable union</i>                | 5.57 (3.24)   | 5.47 - 5.67 | 5.79 (3.28)   | 5.66 - 5.92 | 5.25 (3.15)   | 5.09 - 5.40 |
| <i>Divorced</i>                            | 5.78 (3.40)   | 5.58 - 5.98 | 6.22 (3.37)   | 5.85 - 6.59 | 5.61 (3.40)   | 5.38 - 5.84 |
| <i>Widower</i>                             | 4.56 (3.09)   | 4.29 - 4.83 | 4.76 (3.10)   | 4.00 - 5.52 | 4.53 (3.09)   | 4.24 - 4.82 |
| <i>Single</i>                              | 5.56 (3.36)   | 5.34 - 5.79 | 6.17 (3.33)   | 5.62 - 6.73 | 5.44 (3.36)   | 5.19 - 5.69 |
| <i>Other</i>                               | 7.09 (2.76)   | 6.22 - 7.96 | 7.18 (2.07)   | 6.08 - 8.29 | 7.04 (3.16)   | 5.73 - 8.34 |
| Physical Activity                          | <b>n=6505</b> |             | <b>n=2915</b> |             | <b>n=3590</b> |             |
| <i>Inactive</i>                            | 5.52 (3.35)   | 5.40 - 5.63 | 5.92 (3.39)   | 5.74 - 6.10 | 5.22 (3.29)   | 5.07 - 5.37 |
| <i>Active</i>                              | 5.56 (3.22)   | 5.45 - 5.67 | 5.77 (3.20)   | 5.61 - 5.93 | 5.37 (3.23)   | 5.22 - 5.52 |
| <b>Sitting time (hours/day) - Weekends</b> |               |             |               |             |               |             |
| Schooling                                  | <b>n=6505</b> |             | <b>n=2915</b> |             | <b>n=3590</b> |             |
| <i>Incomplete elementary school</i>        | 3.29 (2.53)   | 3.02 - 3.55 | 3.67 (2.73)   | 3.31 - 4.04 | 2.70 (2.08)   | 2.35 - 3.04 |
| <i>Complete elementary school</i>          | 3.69 (2.77)   | 3.45 - 3.93 | 3.84 (2.83)   | 3.50 - 4.19 | 3.53 (2.71)   | 3.19 - 3.86 |
| <i>High school</i>                         | 3.74 (2.59)   | 3.62 - 3.86 | 4.16 (2.76)   | 3.96 - 4.35 | 3.45 (2.42)   | 3.31 - 3.59 |
| <i>Higher education</i>                    | 5.21 (2.94)   | 5.12 - 5.31 | 5.66 (3.08)   | 5.51 - 5.81 | 4.85 (2.78)   | 4.73 - 4.97 |
| Race/skin colour, n (%)                    | <b>n=6415</b> |             | <b>n=2866</b> |             | <b>n=3549</b> |             |
| <i>Black</i>                               | 3.76 (2.82)   | 3.58 - 3.94 | 4.28 (3.24)   | 3.94 - 4.63 | 3.45 (2.50)   | 3.25 - 3.66 |
| <i>Brown</i>                               | 4.08 (2.80)   | 3.95 - 4.22 | 4.28 (2.82)   | 4.07 - 4.48 | 3.93 (2.78)   | 3.74 - 4.11 |
| <i>White</i>                               | 4.99 (2.90)   | 4.89 - 5.08 | 5.36 (3.03)   | 5.22 - 5.51 | 4.65 (2.74)   | 4.53 - 4.77 |
| <i>Yellow</i>                              | 4.74 (2.92)   | 4.33 - 5.16 | 5.29 (3.28)   | 4.50 - 6.08 | 4.43 (2.65)   | 3.96 - 4.91 |

|                               |                             |               |             |               |             |               |             |
|-------------------------------|-----------------------------|---------------|-------------|---------------|-------------|---------------|-------------|
|                               | <i>Indigenous</i>           | 3.66 (2.75)   | 3.00 - 4.32 | 4.05 (3.45)   | 2.78 - 5.32 | 3.36 (2.04)   | 2.69 - 4.02 |
| Socioeconomic position, n (%) |                             | <b>n=6381</b> |             | <b>n=2868</b> |             | <b>n=3513</b> |             |
|                               | <i>High</i>                 | 5.38 (2.95)   | 5.26 - 5.49 | 5.80 (3.03)   | 5.64 - 5.97 | 4.93 (2.80)   | 4.78 - 5.08 |
|                               | <i>Medium</i>               | 4.20 (2.80)   | 4.08 - 4.31 | 4.55 (2.98)   | 4.35 - 4.76 | 4.00 (2.68)   | 3.87 - 4.14 |
|                               | <i>Low</i>                  | 3.70 (2.64)   | 3.57 - 3.83 | 3.88 (2.74)   | 3.68 - 4.08 | 3.53 (2.53)   | 3.35 - 3.71 |
| Marital status, n (%)         |                             | <b>n=6505</b> |             | <b>n=2915</b> |             | <b>n=3590</b> |             |
|                               | <i>Married/stable union</i> | 4.60 (2.91)   | 4.51 - 4.69 | 4.92 (3.05)   | 4.80 - 5.04 | 4.12 (2.60)   | 3.99 - 4.25 |
|                               | <i>Divorced</i>             | 4.59 (2.96)   | 4.42 - 4.76 | 5.20 (3.16)   | 4.85 - 5.54 | 4.36 (2.85)   | 4.17 - 4.55 |
|                               | <i>Widower</i>              | 3.94 (2.58)   | 3.72 - 4.16 | 4.11 (2.79)   | 3.42 - 4.80 | 3.91 (2.55)   | 3.68 - 4.15 |
|                               | <i>Single</i>               | 4.72 (3.02)   | 4.52 - 4.92 | 5.36 (3.08)   | 4.85 - 5.87 | 4.59 (2.99)   | 4.37 - 4.81 |
|                               | <i>Other</i>                | 5.43 (2.63)   | 4.60 - 6.27 | 5.81 (2.63)   | 4.40 - 7.21 | 5.20 (2.66)   | 4.09 - 6.3  |
| Physical Activity             |                             | <b>n=6505</b> |             | <b>n=2915</b> |             | <b>n=3590</b> |             |
|                               | <i>Inactive</i>             | 4.58 (3.05)   | 4.47 - 4.68 | 5.13 (3.23)   | 4.96 - 5.30 | 4.17 (2.84)   | 4.04 - 4.30 |
|                               | <i>Active</i>               | 4.56 (2.77)   | 4.47 - 4.66 | 4.80 (2.90)   | 4.66 - 4.95 | 4.34 (2.63)   | 4.22 - 4.47 |

---

SD: standard deviation; 95% CI: 95% Confidence Interval.

**Tabela S3.** Leisure and occupational screen time (in hours/day) during the week and weekend according to sociodemographic characteristics and physical activity of the sample stratified by sex. ELSA-Brasil (2012-2014)

| Sedentary behaviour                               | Total         |             | Men           |             | Women         |             |
|---------------------------------------------------|---------------|-------------|---------------|-------------|---------------|-------------|
|                                                   | Mean (SD)     | IC 95%      | Mean (SD)     | IC 95%      | Mean (SD)     | IC 95%      |
| <b>Leisure Screen time (hours/day) - Weekdays</b> |               |             |               |             |               |             |
| Schooling                                         | <b>n=6505</b> |             | <b>n=2915</b> |             | <b>n=3590</b> |             |
| <i>Incomplete elementary school</i>               | 2.40 (2.02)   | 2.19 - 2.61 | 2.59 (2.19)   | 2.30 - 2.89 | 2.10 (1.68)   | 1.82 - 2.38 |
| <i>Complete elementary school</i>                 | 2.80 (2.11)   | 2.62 - 2.98 | 2.75 (1.88)   | 2.52 - 2.98 | 2.85 (2.33)   | 2.56 - 3.14 |
| <i>High school</i>                                | 2.49 (1.92)   | 2.41 - 2.58 | 2.67 (2.01)   | 2.52 - 2.81 | 2.37 (1.84)   | 2.26 - 2.48 |
| <i>Higher education</i>                           | 2.36 (1.56)   | 2.31 - 2.41 | 2.32 (1.50)   | 2.25 - 2.39 | 2.40 (1.60)   | 2.33 - 2.46 |
| Race/skin colour, n (%)                           | <b>n=6415</b> |             | <b>n=2866</b> |             | <b>n=3549</b> |             |
| <i>Black</i>                                      | 2.49 (2.07)   | 2.35 - 2.62 | 2.74 (2.35)   | 2.49 - 2.99 | 2.34 (1.87)   | 2.18 - 2.49 |
| <i>Brown</i>                                      | 2.43 (1.78)   | 2.34 - 2.51 | 2.50 (1.73)   | 2.38 - 2.63 | 2.36 (1.81)   | 2.24 - 2.48 |
| <i>White</i>                                      | 2.44 (1.65)   | 2.38 - 2.49 | 2.41 (1.62)   | 2.34 - 2.49 | 2.45 (1.67)   | 2.38 - 2.53 |
| <i>Yellow</i>                                     | 2.39 (1.74)   | 2.14 - 2.63 | 2.30 (1.47)   | 1.94 - 2.65 | 2.43 (1.88)   | 2.10 - 2.77 |
| <i>Indigenous</i>                                 | 2.40 (1.56)   | 2.03 - 2.78 | 2.37 (1.32)   | 1.88 - 2.85 | 2.44 (1.74)   | 1.87 - 3.00 |
| Socioeconomic position, n (%)                     | <b>n=6381</b> |             | <b>n=2868</b> |             | <b>n=3513</b> |             |
| <i>High</i>                                       | 2.30 (1.58)   | 2.24 - 2.36 | 2.30 (1.61)   | 2.22 - 2.39 | 2.29 (1.55)   | 2.20 - 2.38 |
| <i>Medium</i>                                     | 2.51 (1.79)   | 2.44 - 2.58 | 2.68 (1.79)   | 2.55 - 2.80 | 2.42 (1.78)   | 2.33 - 2.51 |
| <i>Low</i>                                        | 2.56 (1.94)   | 2.46 - 2.66 | 2.55 (1.90)   | 2.42 - 2.69 | 2.57 (1.97)   | 2.43 - 2.71 |
| Marital status, n (%)                             | <b>n=6505</b> |             | <b>n=2915</b> |             | <b>n=3590</b> |             |
| <i>Married/stable union</i>                       | 2.33 (1.66)   | 2.28 - 2.39 | 2.44 (1.73)   | 2.37 - 2.51 | 2.17 (1.52)   | 2.09 - 2.24 |



|                                                   |                                     |               |             |               |             |               |             |
|---------------------------------------------------|-------------------------------------|---------------|-------------|---------------|-------------|---------------|-------------|
|                                                   | <i>Divorced</i>                     | 2.55 (1.90)   | 2.44 - 2.66 | 2.62 (1.76)   | 2.43 - 2.82 | 2.52 (1.95)   | 2.39 - 2.65 |
|                                                   | <i>Widower</i>                      | 2.54 (1.76)   | 2.38 - 2.69 | 2.62 (1.75)   | 2.18 - 3.05 | 2.52 (1.76)   | 2.36 - 2.69 |
|                                                   | <i>Single</i>                       | 2.69 (1.89)   | 2.57 - 2.82 | 2.52 (1.93)   | 2.18 - 3.05 | 2.73 (1.88)   | 2.59 - 2.87 |
|                                                   | <i>Other</i>                        | 2.27 (1.33)   | 1.85 - 2.69 | 1.98 (0.98)   | 1.46 - 2.51 | 2.46 (1.50)   | 1.83 - 3.08 |
| Physical Activity                                 |                                     | <b>n=6505</b> |             | <b>n=2915</b> |             | <b>n=3590</b> |             |
|                                                   | <i>Inactive</i>                     | 2.52 (1.89)   | 2.46 - 2.59 | 2.63 (1.96)   | 2.53 - 2.74 | 2.44 (1.84)   | 2.36 - 2.52 |
|                                                   | <i>Active</i>                       | 2.35 (1.58)   | 2.30 - 2.40 | 2.32 (1.51)   | 2.25 - 2.40 | 2.37 (1.64)   | 2.30 - 2.45 |
| <b>Leisure Screen time (hours/day) - Weekends</b> |                                     |               |             |               |             |               |             |
| Schooling                                         |                                     | <b>n=6505</b> |             | <b>n=2915</b> |             | <b>n=3590</b> |             |
|                                                   | <i>Incomplete elementary school</i> | 2.81 (2.37)   | 2.56 - 3.06 | 3.01 (2.38)   | 2.69 - 3.33 | 2.51 (2.33)   | 2.12 - 2.90 |
|                                                   | <i>Complete elementary school</i>   | 3.13 (2.47)   | 2.92 - 3.35 | 3.21 (2.16)   | 2.95 - 3.47 | 3.05 (2.76)   | 2.71 - 3.40 |
|                                                   | <i>High school</i>                  | 2.99 (2.24)   | 2.88 - 3.09 | 3.22 (2.29)   | 3.05 - 3.38 | 2.82 (2.19)   | 2.69 - 2.95 |
|                                                   | <i>Higher education</i>             | 2.96 (1.89)   | 2.90 - 3.02 | 3.05 (1.92)   | 2.95 - 3.14 | 2.89 (1.87)   | 2.81 - 2.97 |
| Race/skin colour, n (%)                           |                                     | <b>n=6415</b> |             | <b>n=2866</b> |             | <b>n=3549</b> |             |
|                                                   | <i>Black</i>                        | 2.89 (2.32)   | 2.74 - 3.04 | 3.13 (2.46)   | 2.86 - 3.39 | 2.75 (2.22)   | 2.57 - 2.93 |
|                                                   | <i>Brown</i>                        | 2.92 (2.20)   | 2.81 - 3.03 | 3.11 (2.18)   | 2.95 - 3.26 | 2.76 (2.20)   | 2.62 - 2.91 |
|                                                   | <i>White</i>                        | 3.04 (1.96)   | 2.97 - 3.10 | 3.12 (1.96)   | 3.03 - 3.21 | 2.96 (1.95)   | 2.88 - 3.05 |
|                                                   | <i>Yellow</i>                       | 2.78 (2.07)   | 2.49 - 3.08 | 2.71 ( 1.75)  | 2.29 - 3.14 | 2.82 (2.24)   | 2.42 - 3.22 |
|                                                   | <i>Indigenous</i>                   | 2.49 (1.94)   | 2.03 - 2.96 | 2.41 (1.99)   | 1.68 - 3.14 | 2.56 (1.92)   | 1.94 - 3.18 |
| Socioeconomic position, n (%)                     |                                     | <b>n=6381</b> |             | <b>n=2868</b> |             | <b>n=3513</b> |             |
|                                                   | <i>High</i>                         | 2.88 (1.84)   | 2.81 - 2.95 | 3.02 (1.90)   | 2.92 - 3.12 | 2.73 (1.76)   | 2.63 - 2.83 |
|                                                   | <i>Medium</i>                       | 3.07 (2.19)   | 2.98 - 3.16 | 3.35 (2.22)   | 3.19 - 3.50 | 2.93 (2.16)   | 2.81 - 3.04 |

|                                                        |                                     |               |             |               |             |               |             |
|--------------------------------------------------------|-------------------------------------|---------------|-------------|---------------|-------------|---------------|-------------|
|                                                        | <i>Low</i>                          | 2.97 (2.27)   | 2.86 - 3.09 | 2.99 (2.19)   | 2.83 - 3.14 | 2.96 (2.35)   | 2.79 - 3.13 |
| Marital status, n (%)                                  |                                     | <b>n=6505</b> |             | <b>n=2915</b> |             | <b>n=3590</b> |             |
|                                                        | <i>Married/stable union</i>         | 2.94 (2.00)   | 2.88 - 3.00 | 3.11 ( 2.09)  | 3.03 - 3.20 | 2.67 (1.84)   | 2.58 - 2.76 |
|                                                        | <i>Divorced</i>                     | 2.96 (2.12)   | 2.84 - 3.08 | 3.11 (2.07)   | 2.89 - 3.34 | 2.90 (2.14)   | 2.75 - 3.04 |
|                                                        | <i>Widower</i>                      | 2.84 (2.09)   | 2.66 - 3.02 | 2.86 (1.90)   | 2.39 - 3.32 | 2.84 (2.12)   | 2.64 - 3.03 |
|                                                        | <i>Single</i>                       | 3.23 (2.31)   | 3.08 - 3.39 | 2.98 (2.07)   | 2.64 - 3.32 | 3.28 (2.36)   | 3.11 - 3.46 |
|                                                        | <i>Other</i>                        | 2.79 (1.68)   | 2.25 - 3.32 | 3.15 (2.12)   | 2.01 - 4.28 | 2.56 (1.33)   | 2.00 - 3.11 |
| Physical Activity                                      |                                     | <b>n=6505</b> |             | <b>n=2915</b> |             | <b>n=3590</b> |             |
|                                                        | <i>Inactive</i>                     | 3.12 (2.27)   | 3.04 - 3.20 | 3.33 (2.28)   | 3.21 - 3.45 | 2.97 (2.25)   | 2.87 - 3.07 |
|                                                        | <i>Active</i>                       | 2.82 (1.85)   | 2.76 - 2.88 | 2.90 (1.86)   | 2.81 - 2.99 | 2.75 (1.84)   | 2.66 - 2.84 |
| <b>Occupational screen time (hours/day) - Weekdays</b> |                                     |               |             |               |             |               |             |
| Schooling                                              |                                     | <b>n=6505</b> |             | <b>n=2915</b> |             | <b>n=3590</b> |             |
|                                                        | <i>Incomplete elementary school</i> | 0.71 (2.01)   | 0.50 - 0.92 | 0.87 (2.06)   | 0.59 - 1.14 | 0.48 (1.92)   | 0.16 - 0.80 |
|                                                        | <i>Complete elementary school</i>   | 1.06 (2.01)   | 0.89 - 1.24 | 1.24 (2.06)   | 0.99 - 1.49 | 0.88 (1.94)   | 0.64 - 1.12 |
|                                                        | <i>High school</i>                  | 2.15 (2.79)   | 2.03 - 2.28 | 2.36 (2.79)   | 2.17 - 2.56 | 2.01 (2.79)   | 1.84 - 2.17 |
|                                                        | <i>Higher education</i>             | 4.12 (3.03)   | 4.03 - 4.22 | 4.38 (2.80)   | 4.25 - 4.51 | 3.92 (3.19)   | 3.78 - 4.05 |
| Race/skin colour, n (%)                                |                                     | <b>n=6415</b> |             | <b>n=2866</b> |             | <b>n=3549</b> |             |
|                                                        | <i>Black</i>                        | 2.05 (2.67)   | 1.88 - 2.22 | 2.18 (2.71)   | 1.89 - 2.46 | 1.97 (2.64)   | 1.76 - 2.19 |
|                                                        | <i>Brown</i>                        | 2.56 ( 2.96)  | 2.41 - 2.70 | 2.59 (2.88)   | 2.38 - 2.80 | 2.53 (3.02)   | 2.33 - 2.72 |
|                                                        | <i>White</i>                        | 3.64 (3.13)   | 3.53 - 3.74 | 3.81 ( )2.96  | 3.67 - 3.96 | 3.48 (3.27)   | 3.33 - 3.63 |
|                                                        | <i>Yellow</i>                       | 3.85 (3.41)   | 3.37 - 4.34 | 4.11 (3.18)   | 3.34 - 4.87 | 3.71 (3.53)   | 3.08 - 4.34 |

|                                                        |                                     |               |             |               |             |               |             |
|--------------------------------------------------------|-------------------------------------|---------------|-------------|---------------|-------------|---------------|-------------|
|                                                        | <i>Indigenous</i>                   | 1.81 (2.49)   | 1.22 - 2.41 | 2.05 (2.71)   | 1.06 - 3.05 | 1.62 (2.31)   | 0.87 - 2.37 |
| Socioeconomic position, n (%)                          |                                     | <b>n=6381</b> |             | <b>n=2868</b> |             | <b>n=3513</b> |             |
|                                                        | <i>High</i>                         | 4.14 (2.97)   | 4.02 - 4.25 | 4.41 (2.80)   | 4.26 - 4.56 | 3.86 (3.11)   | 3.69 - 4.03 |
|                                                        | <i>Medium</i>                       | 3.04 (3.13)   | 2.91 - 3.17 | 3.33 (3.04)   | 3.11 - 3.54 | 2.88 (3.17)   | 2.72 - 3.04 |
|                                                        | <i>Low</i>                          | 1.54 (2.54)   | 1.41 - 1.67 | 1.32 (2.15)   | 1.16 - 1.48 | 1.76 (2.84)   | 1.56 - 1.96 |
| Marital status, n (%)                                  |                                     | <b>n=6505</b> |             | <b>n=2915</b> |             | <b>n=3590</b> |             |
|                                                        | <i>Married/stable union</i>         | 3.22 (3.06)   | 3.13 - 3.32 | 3.30 (3.00)   | 3.18 - 3.42 | 3.10 (3.15)   | 2.95 - 3.26 |
|                                                        | <i>Divorced</i>                     | 3.35 (3.18)   | 3.16 - 3.53 | 3.43 (2.97)   | 3.10 - 3.75 | 3.32 (3.26)   | 3.09 - 3.54 |
|                                                        | <i>Widower</i>                      | 1.96 (2.63)   | 1.73 - 2.19 | 2.43 (2.94)   | 1.71 - 3.15 | 1.89 (2.58)   | 1.65 - 2.13 |
|                                                        | <i>Single</i>                       | 3.07 (3.22)   | 2.86 - 3.29 | 3.59 (2.81)   | 3.12 - 4.05 | 2.97 (3.29)   | 2.73 - 3.21 |
|                                                        | <i>Other</i>                        | 4.68 (3.17)   | 3.68 - 5.68 | 4.04 (2.72)   | 2.59 - 5.49 | 5.09 (3.42)   | 3.67 - 6.50 |
| Physical Activity                                      |                                     |               |             |               |             |               |             |
|                                                        | <i>Inactive</i>                     | 3.06 (3.17)   | 2.95 - 3.17 | 3.20 (3.08)   | 3.04 - 3.36 | 2.96 (3.23)   | 2.81 - 3.11 |
|                                                        | <i>Active</i>                       | 3.20 (3.02)   | 3.10 - 3.31 | 3.41 (2.90)   | 3.27 - 3.56 | 3.02 (3.12)   | 2.87 - 3.17 |
| <b>Occupational screen time (hours/day) - Weekends</b> |                                     |               |             |               |             |               |             |
| Schooling                                              |                                     | <b>n=6505</b> |             | <b>n=2915</b> |             | <b>n=3590</b> |             |
|                                                        | <i>Incomplete elementary school</i> | 0.45 (1.59)   | 0.28 - 0.61 | 0.64 (1.93)   | 0.38 - 0.90 | 0.14 (0.70)   | 0.02 - 0.26 |
|                                                        | <i>Complete elementary school</i>   | 0.47 (1.25)   | 0.36 - 0.58 | 0.61 (1.37)   | 0.44 - 0.78 | 0.32 (1.09)   | 0.19 - 0.46 |
|                                                        | <i>High school</i>                  | 0.75 (1.54)   | 0.67 - 0.82 | 0.98 (1.79)   | 0.85 - 1.11 | 0.58 (1.32)   | 0.50 - 0.66 |
|                                                        | <i>Higher education</i>             | 1.74 (2.03)   | 1.67 - 1.80 | 1.94 (2.01)   | 1.85 - 2.04 | 1.57 (2.03)   | 1.49 - 1.66 |

|                               |               |             |               |             |               |             |
|-------------------------------|---------------|-------------|---------------|-------------|---------------|-------------|
| Race/skin colour, n (%)       | <b>n=6415</b> |             | <b>n=2866</b> |             | <b>n=3549</b> |             |
| <i>Black</i>                  | 0.77 (1.49)   | 0.68 - 0.87 | 0.95 (1.76)   | 0.76 - 1.13 | 0.67 (1.30)   | 0.56 - 0.77 |
| <i>Brown</i>                  | 1.08 (1.78)   | 0.99 - 1.16 | 1.23 (1.97)   | 1.09 - 1.38 | 0.95 (1.60)   | 0.84 - 1.05 |
| <i>White</i>                  | 1.49 (2.01)   | 1.42 - 1.55 | 1.67 (1.99)   | 1.57 - 1.76 | 1.32 (2.01)   | 1.23 - 1.41 |
| <i>Yellow</i>                 | 1.41 (1.83)   | 1.15 - 1.67 | 1.50 (1.92)   | 1.04 - 1.96 | 1.36 (1.79)   | 1.04 - 1.68 |
| <i>Indigenous</i>             | 0.78 (1.36)   | 0.46 - 1.11 | 0.74 (1.16)   | 0.31 - 1.16 | 0.82 (1.51)   | 0.32 - 1.31 |
| Socioeconomic position, n (%) | <b>n=6381</b> |             | <b>n=2868</b> |             | <b>n=3513</b> |             |
| <i>High</i>                   | 1.96 (2.11)   | 1.88 - 2.04 | 2.07 (2.03)   | 1.96 - 2.18 | 1.84 (2.19)   | 1.72 - 1.96 |
| <i>Medium</i>                 | 0.95 (1.63)   | 0.88 - 1.02 | 1.12 (1.82)   | 1.00 - 1.25 | 0.86 (1.51)   | 0.78 - 0.93 |
| <i>Low</i>                    | 0.61 (1.51)   | 0.53 - 0.69 | 0.78 (1.73)   | 0.66 - 0.91 | 0.44 (1.23)   | 0.36 - 0.53 |
| Marital status, n (%)         | <b>n=6505</b> |             | <b>n=2915</b> |             | <b>n=3590</b> |             |
| <i>Married/stable union</i>   | 1.35 (1.92)   | 1.29 - 1.41 | 1.48 (1.97)   | 1.40 - 1.56 | 1.16 (1.83)   | 1.07 - 1.25 |
| <i>Divorced</i>               | 1.31 (1.90)   | 1.20 - 1.42 | 1.50 (2.08)   | 1.27 - 1.73 | 1.24 (1.82)   | 1.11 - 1.36 |
| <i>Widower</i>                | 0.72 (1.34)   | 0.60 - 0.83 | 1.10 (1.75)   | 0.67 - 1.53 | 0.66 (1.27)   | 0.54 - 0.78 |
| <i>Single</i>                 | 1.26 (2.06)   | 1.12 - 1.40 | 1.63 (2.00)   | 1.30 - 1.97 | 1.19 (2.07)   | 1.04 - 1.34 |
| <i>Other</i>                  | 1.85 (1.97)   | 1.23 - 2.47 | 1.09 (1.11)   | 0.50 - 1.68 | 2.34 (2.25)   | 1.40 - 3.27 |
| Physical Activity             | <b>n=6505</b> |             | <b>n=2915</b> |             | <b>n=3590</b> |             |
| <i>Inactive</i>               | 1.22 (1.97)   | 1.15 - 1.29 | 1.45 (2.12)   | 1.34 - 1.57 | 1.05 (1.83)   | 0.96 - 1.13 |
| <i>Active</i>                 | 1.35 (1.84)   | 1.29 - 1.41 | 1.50 (1.85)   | 1.40 - 1.59 | 1.22 (1.83)   | 1.13 - 1.30 |

---

SD: standard deviation; 95% CI: 95% Confidence Interval.
